# Supplementary material
Source: PubMed Central journal article supplement (PMC3024746)

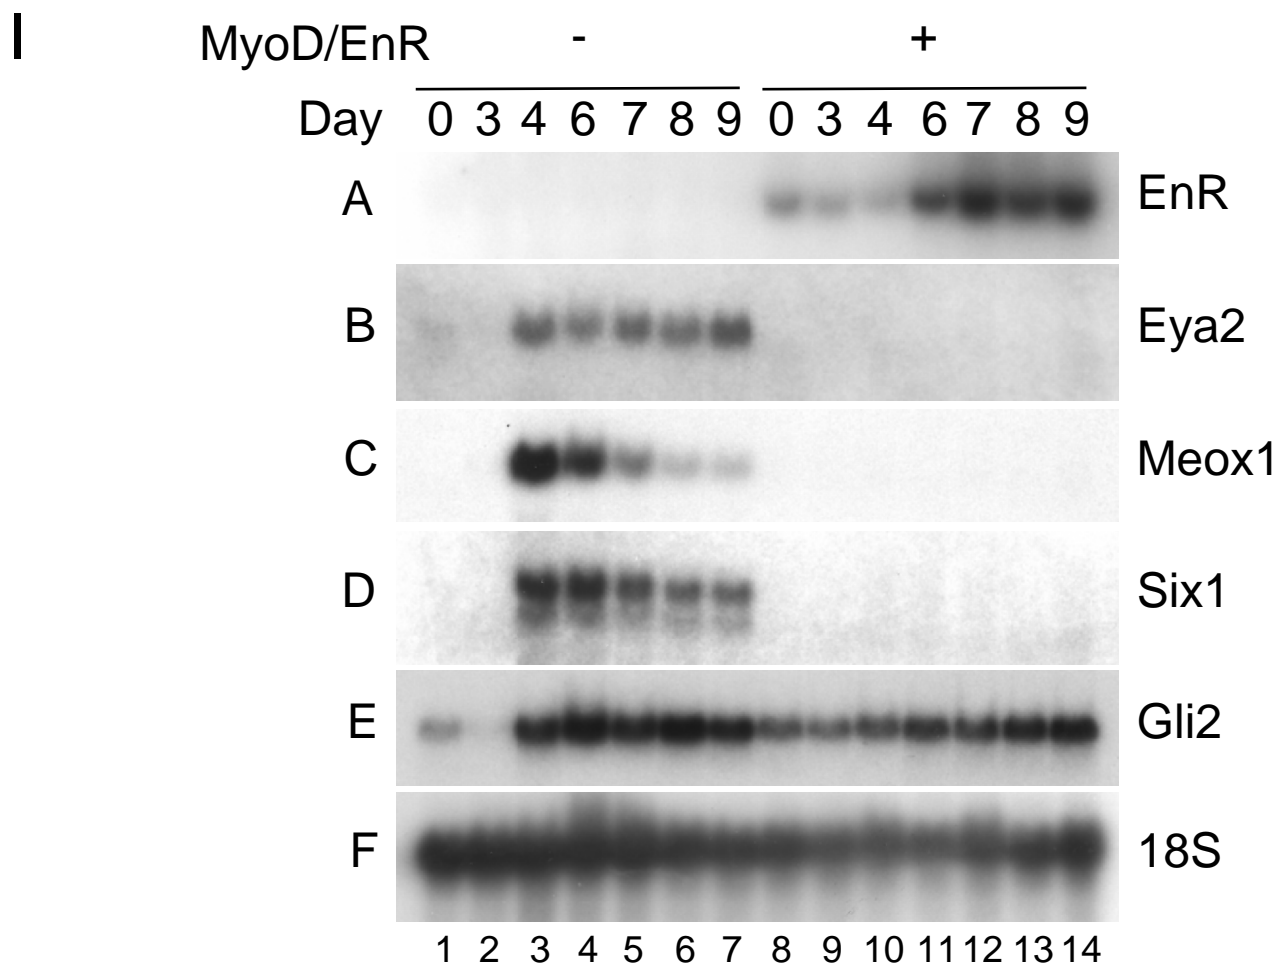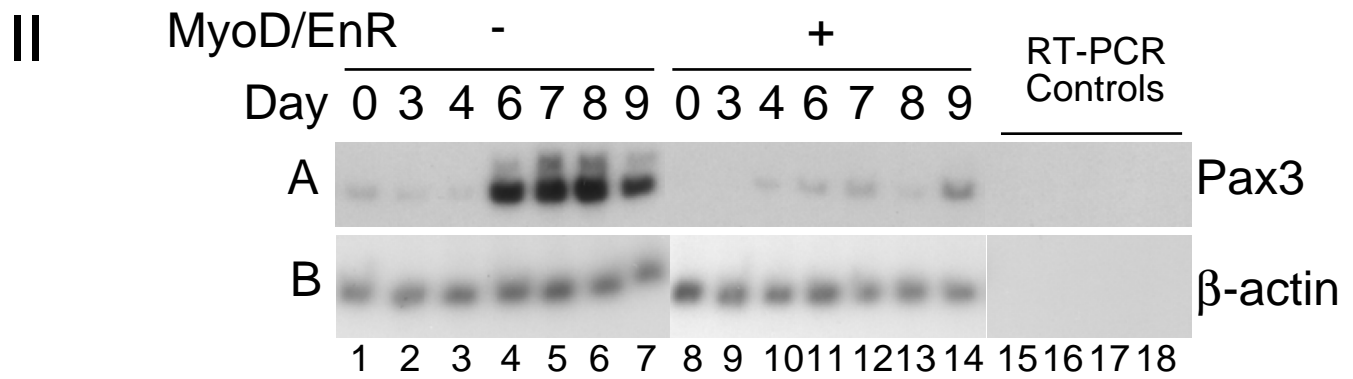

Fig. S1

Supplement: supp_M110.163709_jbc.M110.163709-1.pdf [file supp_M110.163709_jbc.M110.163709-1.pdf]
